# Supplementary material for: Tracking protein–protein interactions by NMR: conformational selection in human steroidogenic cytochrome P450 CYP17A1 induced by cytochrome b5
Source: Phys Chem Chem Phys. 2024 May 31;26(24):16980–8. doi: 10.1039/d4cp01268b (PMC11186455; doi:10.1039/d4cp01268b)
Supplement: CP-026-D4CP01268B-s001 [file CP-026-D4CP01268B-s001.xlsx]

## Sheet: Sheet1
sec struct		CA	CB	H	N	HD	HD'	HD1	HE	HE'	HH	HN	HO	ND	NE	NN	b/d	b5
		indicates provisional assignment. See text for details.
	20A	60.23	14.36	-	-	-	-	-	-	-	-	-	-	-	-	-
	21K	59.52	31.71	8.245	116	-	-	-	-	-	-	-	-	-	-	-
	22K	58.68	31.67	7.089	118.1	-	-	-	-	-	-	-	-	-	-	-
	23T	61.23	70.04	8.102	116.3	-	-	-	-	-	-	-	-	-	-	-
	24G	44.78	-	8.311	111.6	-	-	-	-	-	-	-	-	-	-	-
	25A	51.87	18.31	7.99	124.1	-	-	-	-	-	-	-	-	-	-	-
	26K	55.08	31.85	8.083	120.8	-	-	-	-	-	-	-	-	-	-	-
	27Y	55.74	42.08	8.102	116.3	-	-	-	-	-	-	-	-	-	-	-
	28P(c)	62.64	-	-	-	-	-	-	-	-	-	-	-	-	-	-
	29K'	55.82	-	8.228	122.1	-	-	-	-	-	-	-	-	-	-	-
	29K	55.74	31.91	8.418	124.2	-	-	-	-	-	-	-	-	-	-	-
	30S	57.63	63.03	8.133	117.8	-	-	-	-	-	-	-	-	-	-	-
	32L	54.63	41.36	7.988	116	-	-	-	-	-	-	-	-	-	-	-
	33S	59.04	62.59	8.006	116	-	-	-	-	-	-	-	-	-	-	-
	34L	55.09	39.85	7.928	119.4	-	-	-	-	-	-	-	-	-	-	-
	35P	61.45	31.74	-	-	-	-	-	-	-	-	-	-	-	-	-
	36L	57.71	41.82	8.17	121.9	-	-	-	-	-	-	-	-	-	-	-
	37V	61.91	27.9	7.911	121.4	-	-	-	-	-	-	-	-	-	-	-
	38G	45.18	-	8.358	111.7	-	-	-	-	-	-	-	-	-	-	-
	39S	57.87	61.46	7.962	113.5	-	-	-	-	-	-	-	-	-	-	-	d	poss coll
	40L	-	-	7.85	118.7	-	-	-	-	-	-	-	-	-	-	-
	42F	-	-	7.815	116.5	-	-	-	-	-	-	-	-	-	-	-
	43L	-	-	8.768	116.8	-	-	-	-	-	-	-	-	-	-	-	d	poss coll
	43L'			8.68	117
	44P	60.77	-	-	-	-	-	-	-	-	-	-	-	-	-	-
	45R	-	28.13	8.033	121.7	-	-	-	-	-	-	-	-	-	-	-	d
	46H	54.89	-	8.176	124.8	-	-	-	-	-	-	-	-	-	-	-	d
	46H'	-	-	8.096	121.7	-	-	-	-	-	-	-	-	-	-	-	d
	47G	46.41	-	7.744	120	-	-	-	-	-	-	-	-	-	-	-	d
	48H	64.26	26.65	8.834	115.9	-	-	-	-	-	-	-	-	-	-	-	d	poss coll
	48H'			8.84	116.3
helix A	49M	59.22	31.07	7.762	119.1	-	-	-	-	-	-	-	-	-	-	-	d
helix A	50H	56.09	38.08	7.674	114.9	-	-	-	-	-	-	-	-	-	-	-
helix A	51N	59.81	35.06	8.37	120.9	-	-	-	-	-	-	-	-	-	-	-
helix A	52N	54.57	36.18	8.437	127	-	-	-	-	-	-	-	-	-	-	-
helix A	53F	56.01	40.23	7.571	118.8	-	-	-	-	-	-	-	-	-	-	-
helix A	54F	56.42	37.73	7.294	117.8	-	-	-	-	-	-	-	-	-	-	-
helix A	55K	56.22	32.17	7.924	121.3	-	-	-	-	-	-	-	-	-	-	-
helix A	56L	56.51	40.64	8.274	120.2	-	-	-	-	-	-	-	-	-	-	-
helix A	57Q	57.22	27.05	7.806	118.8	-	-	-	-	-	-	-	-	-	-	-
helix A	58K	58.5	30.97	7.325	119	-	-	-	-	-	-	-	-	-	-	-
helix A	59K	56.69	32.63	7.031	116.5	-	-	-	-	-	-	-	-	-	-	-
helix A	60Y	60.17	39.41	7.871	119.1	-	-	-	-	-	-	-	-	-	-	-
	61G	46.36	-	9.856	118	-	-	-	-	-	-	-	-	-	-	-
	62P	63.89	-	-	-	-	-	-	-	-	-	-	-	-	-	-
b1	63I	59.74	-	8.995	127.8	-	-	-	-	-	-	-	-	-	-	-
b1	64Y	57.93	-	8.014	126.3	-	-	-	-	-	-	-	-	-	-	-
b1	65S	56.45	-	7.783	110.4	-	-	-	-	-	-	-	-	-	-	-
b1	66V	63.6	-	7.921	118.5	-	-	-	-	-	-	-	-	-	-	-
b1	67R	60.69	27.06	8.906	114.7	-	-	-	-	-	-	-	-	-	-	-
b1	68M	59.96	-	7.721	117.2	-	-	-	-	-	-	-	-	-	-	-
b1	69G	42.49	-	-	-	-	-	-	-	-	-	-	-	-	-	-
b1	70T	60.97	-	6.254	117.1	-	-	-	-	-	-	-	-	-	-	-
b1	71K	55.73	33.3	7.803	127.7	-	-	-	-	-	-	-	-	-	-	-
b1	72T	62.02	69.61	8.597	122.1	-	-	-	-	-	-	-	-	-	-	-
b1	73T	61.3	70.63	8.729	124.4	-	-	-	-	-	-	-	-	-	-	-
b1	74V	63.57	-	7.967	121.8	-	-	-	-	-	-	-	-	-	-	-
b1	75I	58.28	38.62	7.45	117.8	-	-	-	-	-	-	-	-	-	-	-
b1	76V	60.63	-	-	-	-	-	-	-	-	-	-	-	-	-	-
b1	76V?	-	-	7.765	120	-	-	-	-	-	-	-	-	-	-	-
	77G	43.92	-	8.998	112.9	-	-	-	-	-	-	-	-	-	-	-
	78H	56.13	35.26	6.533	116.6	-	-	-	-	-	-	-	-	-	-	-
helix B	79H	53.02	34.01	6.711	114.8	-	-	-	-	-	-	-	-	-	-	-
helix B	80Q	54.27	-	-	-	-	-	-	-	-	-	-	-	-	-	-
helix B	81L	55.83	-	7.877	113.1	-	-	-	-	-	-	-	-	-	-	-
helix B	82A	54.4	17.77	6.638	119	-	-	-	-	-	-	-	-	-	-	-
helix B	83K	59.63	30.63	7.921	116.2	-	-	-	-	-	-	-	-	-	-	-
helix B	84E	59.95	28.36	7.2	122.1	-	-	-	-	-	-	-	-	-	-	-
helix B	85V	59.22	-	7.495	117.8	-	-	-	-	-	-	-	-	-	-	-
helix B	86L	55.67	-	8.104	116.9	-	-	-	-	-	-	-	-	-	-	-
helix B	87I	62.13	36.13	7.451	121.6	-	-	-	-	-	-	-	-	-	-	-
helix B	88K	60.04	31.83	7.845	123	-	-	-	-	-	-	-	-	-	-	-
helix B	89K	54.13	30.58	8.694	119	-	-	-	-	-	-	-	-	-	-	-
helix B	90G	47.08	-	6.905	105.7	-	-	-	-	-	-	-	-	-	-	-
helix B	90G'	-	-	6.933	105.8	-	-	-	-	-	-	-	-	-	-	-
helix B	91K'	58.58	-	7.779	120	-	-	-	-	-	-	-	-	-	-	-
helix B	91K	59.17	30.78	8.503	120.3	-	-	-	-	-	-	-	-	-	-	-
helix B	92D	56.49	39.24	7.661	121.7	-	-	-	-	-	-	-	-	-	-	-
helix B	92D'	-	-	7.662	121.4	-	-	-	-	-	-	-	-	-	-	-
loop B-B'	93F	70.24	-	7.021	113.3	-	-	-	-	-	-	-	-	-	-	-
loop B-B'	94S	58.87	-	7.352	114.5	-	-	-	-	-	-	-	-	-	-	-
loop B-B'	95G	42.25	-	6.309	111.1	-	-	-	-	-	-	-	-	-	-	-
loop B-B'	96R'	-	-	8.532	119.7	-	-	-	-	-	-	-	-	-	-	-	d
loop B-B'	96R	-	-	8.779	119.6	-	-	-	-	-	-	-	-	-	-	-
loop B-B'	97P	64.77	32.48	-	-	-	-	-	-	-	-	-	-	-	-	-
loop B-B'	98Q	58.69	26.59	9.853	114	-	-	-	-	-	-	-	-	-	-	-	d	coll
loop B-B'	98Q'	-	-	9.844	113.9	-	-	-	-	-	-	-	-	-	-	-
loop B-B'	99M	-	-	8.094	121.7	-	-	-	-	-	-	-	-	-	-	-
loop B-B'	100A	53.8	-	8.254	122.9	-	-	-	-	-	-	-	-	-	-	-
helix B'	101T	63.72	70.09	6.814	114.1	-	-	-	-	-	-	-	-	-	-	-
helix B'	102L	56.87	38.28	6.311	120.2	-	-	-	-	-	-	-	-	-	-	-
helix B'	103D	57.79	-	8.613	123.7	-	-	-	-	-	-	-	-	-	-	-	b	prob coll
helix B'	104I	63.55	37.13	7.102	118.6	-	-	-	-	-	-	-	-	-	-	-
helix B'	105A	55.58	-	8.255	126.2	-	-	-	-	-	-	-	-	-	-	-
helix B'	106S	55.59	62.03	8.165	118.5	-	-	-	-	-	-	-	-	-	-	-
loop B'-C	107N	55.63	41.23	6.955	119.9	-	-	-	-	-	-	-	-	-	-	-
loop B'-C	108N	53.22	39.87	8.671	126.3	-	-	-	-	-	-	-	-	-	-	-
loop B'-C	109R	54.37	30.74	8.505	125.8	-	-	-	-	-	-	-	-	-	-	-
loop B'-C	110K	53.86	32.53	8.381	125.9	-	-	-	-	-	-	-	-	-	-	-
loop B'-C	111G	-	-	7.838	112.9	-	-	-	-	-	-	-	-	-	-	-
loop B'-C	112I	60.37	-	-	-	-	-	-	-	-	-	-	-	-	-	-
loop B'-C	113A	53.75	-	8.127	120.9	-	-	-	-	-	-	-	-	-	-	-
loop B'-C	114F	-	-	8.113	124.5	-	-	-	-	-	-	-	-	-	-	-
loop B'-C	115A	-	-	8.49	120.5	-	-	-	-	-	-	-	-	-	-	-
loop B'-C	116D	57.19	41.71	8.61	121.7	-	-	-	-	-	-	-	-	-	-	-
loop B'-C	117S	57.87	61.28	8.169	120	-	-	-	-	-	-	-	-	-	-	-
loop B'-C	118G	43.76	-	7.744	111.4	-	-	-	-	-	-	-	-	-	-	-
helix C	119A	55.06	18.19	8.691	122	-	-	-	-	-	-	-	-	-	-	-	d	prob coll
helix C	119A'	55	-	8.652	122	-	-	-	-	-	-	-	-	-	-	-
helix C	120H	57.08	-	8.274	117.7	-	-	-	-	-	-	-	-	-	-	-
helix C	121W	56.37	38.02	8.674	118.5	-	-	-	-	-	-	-	-	-	-	-
helix C	122Q	58.27	30.56	7.456	120.2	-	-	-	-	-	-	-	-	-	-	-
helix C	122Q'	-	-	7.399	120.2	-	-	-	-	-	-	-	-	-	-	-	d	prob coll
helix C	123L	58.73	38.29	8.001	121.1	-	-	-	-	-	-	-	-	-	-	-	d
helix C	124H	58.16	-	8.279	120.1	-	-	-	-	-	-	-	-	-	-	-
helix C	124H'	-	-	8.29	-	-	-	-	-	-	-	-	-	-	-	-	d
helix C	125R	60.08	-	8.805	119.6	-	-	-	-	-	-	-	-	-	-	-	d
helix C	125R'	-	-	8.86	119.6	-	-	-	-	-	-	-	-	-	-	-
helix C	126R	59.25	28.29	7.356	118.7	-	-	-	-	-	-	-	-	-	-	-
helix C	127L	54.98	43.34	8.234	121	-	-	-	-	-	-	-	-	-	-	-
helix C	128A	51.85	18.34	8.183	124.5	-	-	-	-	-	-	-	-	-	-	-
helix C	129M	-	-	7.814	126	-	-	-	-	-	-	-	-	-	-	-
helix C	130A	51.96	-	-	-	-	-	-	-	-	-	-	-	-	-	-
helix C	131T	60.84	-	6.364	122.6	-	-	-	-	-	-	-	-	-	-	-
helix C	134L	55.34	-	-	-	-	-	-	-	-	-	-	-	-	-	-
helix C	135F	57.16	-	7.504	118.7	-	-	-	-	-	-	-	-	-	-	-
loop C-D	136K	58.44	33.09	7.228	114.2	-	-	-	-	-	-	-	-	-	-	-
loop C-D	137D	51.82	39.81	7.314	117	-	-	-	-	-	-	-	-	-	-	-
loop C-D	138G	44.1	-	8.639	108.9	-	-	-	-	-	-	-	-	-	-	-	d	coll
loop C-D	138G'	-	-	8.847	108.8	-	-	-	-	-	-	-	-	-	-	-
loop C-D	139D	53.74	35.35	9.34	110.6	-	-	-	-	-	-	-	-	-	-	-	d	prob coll
loop C-D	139D'	-	-	9.286	110.6	-	-	-	-	-	-	-	-	-	-	-
loop C-D	140Q'	57.24	-	-	-	-	-	-	-	-	-	-	-	-	-	-
loop C-D	140Q	56.95	25.12	8.219	114.9	-	-		5.523	-	-	-	-	-	-	-	d	poss coll	overlap w R358
loop C-D	141K	57.01	30.99	7.973	118.3	-	-	-	-	-	-	-	-	-	-	-	d
loop C-D	141K'	53.88	31.05	7.544	119.4	-	-	-	-	-	-	-	-	-	-	-
helix D	142L	53.46	-	8.107	119.9	-	-	-	-	-	-	-	-	-	-	-
helix D	144K	58.15	-	8.272	-	-	-	-	-	-	-	-	-	-	-	-
helix D	145I	63.02	-	7.984	119.9	-	-	-	-	-	-	-	-	-	-	-
helix D	146I	-	-	7.831	119.8	-	-	-	-	-	-	-	-	-	-	-
helix D	147C	58.65	-	7.713	120	-	-	-	-	-	-	-	-	-	-	-
helix D	148Q	-	-	8.072	122.2	-	-	-	-	-	-	-	-	-	-	-
helix D	149E	59.85	-	-	-	-	-	-	-	-	-	-	-	-	-	-
helix D	150I	-	-	6.918	115.6	-	-	-	-	-	-	-	-	-	-	-
helix D	151S	57.86	-	8.854	113.1	-	-	-	-	-	-	-	-	-	-	-
helix D	152T	60.8	-	7.074	115.4	-	-	-	-	-	-	-	-	-	-	-
helix D	153L	-	-	8.47	122.3	-	-	-	-	-	-	-	-	-	-	-
helix D	155D	-	-	7.915	119.1	-	-	-	-	-	-	-	-	-	-	-
helix D	156M	53.79	-	8.259	118.7	-	-	-	-	-	-	-	-	-	-	-
helix D	157L	57.57	-	8.59	121.4	-	-	-	-	-	-	-	-	-	-	-
helix D	158A	54.82	16.99	8.207	119.4	-	-	-	-	-	-	-	-	-	-	-
helix D	159T	63.84	68.54	7.394	110.5	-	-	-	-	-	-	-	-	-	-	-
helix D	160H	54.15	27.37	7.675	119.9	-		9.152	-	-	-	-	-	-	-	-
helix D	161N	55.44	38.85	6.897	115.8	7.16	7.8	-	-	-	-	-	-	114.5	-	-	d
helix D	161N'	52.78	39.9	7.528	117.6	-	-	-	-	-	-	-	-	-	-	-
b5	162G	45.01	-	9.708	116.6	-	-	-	-	-	-	-	-	-	-	-	d	poss coll
b5	162G'	-	-	9.687	116.5	-	-	-	-	-	-	-	-	-	-	-
b5	163Q	54.18	29.85	8.322	120.1	-	-	-	-	-	-	-	-	-	-	-	d
b5	163Q'	-	-	8.313	120.7	-	-	-	-	-	-	-	-	-	-	-
b5	164S'	57.09	-	-	115.8	-	-	-	-	-	-	-	-	-	-	-
b5	164S	57.02	63.04	8.306	115.9	-	-	-	-	-	-	-	-	-	-	-	d
b5	165I	58.27	41.76	8.653	118.9	-	-	-	-	-	-	-	-	-	-	-	d
b5	165I'	-	-	8.681	118.9	-	-	-	-	-	-	-	-	-	-	-
	166D	51.77	40	8.334	121.9	-	-	-	-	-	-	-	-	-	-	-
	166D'	-	-	8.374	122.2	-	-	-	-	-	-	-	-	-	-	-
	167I	61.04	37.66	8.124	123.8	-	-	-	-	-	-	-	-	-	-	-
helix E	168S	63.38	62.27	8.373	117.2	-	-	-	-	-	-	-	-	-	-	-
helix E	169F	54.95	39.84	7.983	118.2	-	-	-	-	-	-	-	-	-	-	-
helix E	170P	64.26	-	-	-	-	-	-	-	-	-	-	-	-	-	-
helix E	171V	61.66	-	6.796	116	-	-	-	-	-	-	-	-	-	-	-		slo x
helix E	172F	59.98	-	7.878	111.7	-	-	-	-	-	-	-	-	-	-	-		slo x
helix E	173V	57.55	-	-	-	-	-	-	-	-	-	-	-	-	-	-		slo x
helix E	174A	55.4	-	8.077	123.8	-	-	-	-	-	-	-	-	-	-	-
helix E	175V	61.48	-	8.105	111	-	-	-	-	-	-	-	-	-	-	-
helix E	176T	65.5	-	7.822	112.4	-	-	-	-	-	-	-	-	-	-	-
helix E	177N	52.83	-	7.544	120.3	6.524	8.124	-	-	-	-	-	-	112.6	-	-
helix E	178V	60.59	-	6.791	110.8	-	-	-	-	-	-	-	-	-	-	-
helix E	179I	56.42	-	7.279	111.4	-	-	-	-	-	-	-	-	-	-	-
helix E	180S	57.54	-	8.051	116.9	-	-	-	-	-	-	-	-	-	-	-
helix E	181L	-	39.89	8.092	117.4	-	-	-	-	-	-	-	-	-	-	-
helix E	182I'	63.62	-	-	-	-	-	-	-	-	-	-	-	-	-	-
helix E	182I	63.35	34.77	8.386	117.4	-	-	-	-	-	-	-	-	-	-	-
helix E	183C'	62.42	-	9.099	121.2	-	-	-	-	-	-	-	-	-	-	-
helix E	183C	62.4	35.28	9.045	121	-	-	-	-	-	-	-	-	-	-	-
loop E-F	184F	54.45	38.93	7.34	115.8	-	-	-	-	-	-	-	-	-	-	-
loop E-F	184F'	-	-	7.447	115.9	-	-	-	-	-	-	-	-	-	-	-	d	prob coll
loop E-F	185N'	54.59	-	8.054	115.6	-	-	-	-	-	-	-	-	-	-	-
loop E-F	185N	54.73	37.85	8.11	115.1	-	-	-	-	-	-	-	-	-	-	-	d
loop E-F	186T	59.97	71	7.068	109.6	-	-	-	-	-	-		4.007	-	-	-	d	prob coll
loop E-F	186T'	-	-	7.01	110.1	-	-	-	-	-	-		4	-	-	-
loop E-F	187S	56.32	64.11	7.557	111.7	-	-	-	-	-	-	-	-	-	-	-	d	prob coll
loop E-F	187S'	-	-	7.532	112.1	-	-	-	-	-	-	-	-	-	-	-
loop E-F	188Y	57.58	40.4	9.079	119.6	-	-	-	-	-	-	-	-	-	-	-	d
loop E-F	188Y'	-	-	9.125	119.8	-	-	-	-	-	-	-	-	-	-	-		?
loop E-F	189K	54.39	32.41	9.174	123.5	-	-	-	-	-	-	-	-	-	-	-	d	poss coll
loop E-F	189K'	-	-	9.263	123.7	-	-	-	-	-	-	-	-	-	-	-
loop E-F	190N'	55.22	-	-	-	-	-	-	-	-	-	-	-	-	-	-	d
loop E-F	190N	55.17	37.72	8.452	118.9	6.71	7.608	-	-	-	-	-	-	113.7	-	-
loop E-F	191G	44.56	-	8.637	114.4	-	-	-	-	-	-	-	-	-	-	-	d	?
loop E-F	192D	52.64	40.59	8.012	124.3	-	-	-	-	-	-	-	-	-	-	-	d
loop E-F	192D'	-	-	8.043	122.8	-	-	-	-	-	-	-	-	-	-	-
helix F	193P	63.89	-	-	-	-	-	-	-	-	-	-	-	-	-	-
helix F	194E	59.53	28.91	9.494	121.3	-	-	-	-	-	-	-	-	-	-	-	d	prob coll
helix F	194E'	-	-	9.507	121.2	-	-	-	-	-	-	-	-	-	-	-
helix F	195L	57.44	41.75	7.257	115.9	-	-	-	-	-	-	-	-	-	-	-
helix F	196N	56.13	38.02	6.991	115	-	-	-	-	-	-	-	-	-	-	-
helix F	197V	66.16	31.04	7.292	121.6	-	-	-	-	-	-	-	-	-	-	-
helix F	198I	64.28	41.83	7.807	122.3	-	-	-	-	-	-	-	-	-	-	-
helix F	199Q	58.72	26.99	7.723	119.9	-	-	-	-	-	-	-	-	-	-	-
helix F	200N	56.84	-	6.925	116.3		8.793	-	-	-	-	-	-	116	-	-
helix F	201Y	58.36	37.27	8.224	116.6	-	-	-	-	-	-	-	-	-	-	-
helix F	202N	57.22	41.24	7.623	119.1	-	-	-	-	-	-	-	-	-	-	-
helix F	203E	59.06	25.71	8.849	123.9	-	-	-	-	-	-	-	-	-	-	-
helix F	204G	45.53	-	7.637	106.5	-	-	-	-	-	-	-	-	-	-	-
helix F	205I	59.53	-	8.349	119.5	-	-	-	-	-	-	-	-	-	-	-
helix F	206I	59.38	37.22	7.909	119.2	-	-	-	-	-	-	-	-	-	-	-
helix F	207D	54.41	-	8.115	122.2	-	-	-	-	-	-	-	-	-	-	-	d	poss coll
helix F	207D'	54.21	-	-	-	-	-	-	-	-	-	-	-	-	-	-
helix F	208N'	58.18	38.24	8.339	120.1	-	-	-	-	-	-	-	-	-	-	-
helix F	208N	58.22	38.43	8.473	120.3	-	-	-	-	-	-	-	-	-	-	-	d	poss coll
loop F-G	209L'	59.27	-	7.771	119.5	-	-	-	-	-	-	-	-	-	-	-
loop F-G	209L	-	-	8.265	119.1	-	-	-	-	-	-	-	-	-	-	-
loop F-G	210S	-	-	8.469	123.3	-	-	-	-	-	-	-	-	-	-	-
loop F-G	211K	51.23	-	8.806	128.5	-	-	-	-	-	-	-	-	-	-	-
loop F-G	211K'	51.13	-	-	-	-	-	-	-	-	-	-	-	-	-	-
loop F-G	212D	52.44	42.05	8.816	121.5	-	-	-	-	-	-	-	-	-	-	-
loop F-G	212D'	-	-	8.79	121.5	-	-	-	-	-	-	-	-	-	-	-
loop F-G	213S	56.5	62.39	8.251	122.2	-	-	-	-	-	-	-	-	-	-	-
loop F-G	213S'	56.56	62.06	8.229	122	-	-	-	-	-	-	-	-	-	-	-
loop F-G	214L	58.79	40.12	7.884	117.9	-	-	-	-	-	-	-	-	-	-	-
loop F-G	214L'	-	-	7.848	117.9	-	-	-	-	-	-	-	-	-	-	-
loop F-G	215V'	58.61	-	8.557	118.9	-	-	-	-	-	-	-	-	-	-	-
loop F-G	215V	58.89	-	8.501	118.9	-	-	-	-	-	-	-	-	-	-	-
loop F-G	216D	55.11	37.99	7.843	117.5	-	-	-	-	-	-	-	-	-	-	-
loop F-G	217L	53.96	39.3	8.174	121.5	-	-	-	-	-	-	-	-	-	-	-
loop F-G	218V	-	-	8.378	124.9	-	-	-	-	-	-	-	-	-	-	-
loop F-G	218V'	-	-	8.415	124.9	-	-	-	-	-	-	-	-	-	-	-
loop F-G	219P	62.35	33.43	-	-	-	-	-	-	-	-	-	-	-	-	-
loop F-G	219P'	-	31.78	-	-	-	-	-	-	-	-	-	-	-	-	-
loop F-G	220W	53.9	40.63	8.376	122.2	-	-	-	-	-	-	-	-	-	-	-
loop F-G	220W'	56.41	40.11	8.377	122.5	-	-	-	-	-	-	-	-	-	-	-
loop F-G	221L	60.76	40.25	8.451	121.7	-	-	-	-	-	-	-	-	-	-	-
loop F-G	222K	59.37	29.19	7.809	118.7	-	-	-	-	-	-	-	-	-	-	-
loop F-G	222K'	59.34	-	7.824	118.8	-	-	-	-	-	-	-	-	-	-	-
loop F-G	223I	64.63	37.59	7.481	119.4	-	-	-	-	-	-	-	-	-	-	-
loop F-G	224F	57.16	39.23	8.141	121.9	-	-	-	-	-	-	-	-	-	-	-
loop F-G	225P	63.52	-	-	-	-	-	-	-	-	-	-	-	-	-	-
loop F-G	226N	52.13	-	8.476	124.7	-	-	-	-	-	-	-	-	-	-	-
loop F-G	227K	61.9	31.27	7.979	118.3	-	-	-	-	-	-	-	-	-	-	-
loop F-G	228T	65.73	67.88	7.147	117.6	-	-	-	-	-	-	-	-	-	-	-
loop F-G	228'T	-	-	7.198	117.8	-	-	-	-	-	-	-	-	-	-	-
helix G	229L	57.99	40.25	7.638	124.8	-	-	-	-	-	-	-	-	-	-	-
helix G	230E	59.86	26.88	9.076	112.1	-	-	-	-	-	-	-	-	-	-	-	broad
helix G	231K	58.59	-	9.055	127	-	-	-	-	-	-	-	-	-	-	-	broad
helix G	232L	55.83	41.14	6.63	117.5	-	-	-	-	-	-	-	-	-	-	-
helix G	233K	-	-	8.068	-	-	-	-	-	-	-	-	-	-	-	-
helix G	235H	59.49	32.27	7.503	121	-	-	-	-	-	-	-	-	-	-	-	d	prob coll
helix G	235H'	-	-	7.547	121.1	-	-	-	-	-	-	-	-	-	-	-
helix G	236V	65.87	30.8	8.355	119.7	-	-	-	-	-	-	-	-	-	-	-
helix G	237K	59.32	30.81	7.871	121	-	-	-	-	-	-	-	-	-	-	-
helix G	238I	64	36.37	6.834	118.6	-	-	-	-	-	-	-	-	-	-	-
helix G	239R	58.89	-	7.112	121.8	-	-	-	-	-	-	-	-	-	-	-
helix G	240N	54.97	35.97	9.044	118.4	-	-	-	-	-	-	-	-	-	-	-
helix G	241D	56.85	39.35	8.55	121	-	-	-	-	-	-	-	-	-	-	-
helix G	242L	58.77	40.65	7.811	124	-	-	-	-	-	-	-	-	-	-	-
helix G	243L	58.08	40.62	8.27	117.7	-	-	-	-	-	-	-	-	-	-	-
helix G	245K	57.57	31.88	8.267	117.8	-	-	-	-	-	-	-	-	-	-	-
helix G	246I	59.94	34.62	8.326	116.6	-	-	-	-	-	-	-	-	-	-	-
helix G	247L	61.4	40.06	7.643	115.6	-	-	-	-	-	-	-	-	-	-	-
helix G	248E	-	-	7.463	-	-	-	-	-	-	-	-	-	-	-	-
helix G	249N	54.67	38.27	8.233	118.9	-	-	-	-	-	-	-	-	-	-	-
helix G	250Y	57.92	38.29	9.511	128.9	-	-	-	-	-	-	-	-	-	-	-
helix G	251K	56.6	30.88	8.216	118.8	-	-	-	-	-	-	-	-	-	-	-
helix G	252E	55.26	30.5	7.23	116	-	-	-	-	-	-	-	-	-	-	-
helix G	253K	55.5	-	7.441	118.4	-	-	-	-	-	-	-	-	-	-	-	d	poss coll
helix G	253K'	-	-	7.484	118.6	-	-	-	-	-	-	-	-	-	-	-
loop G-H	254F	58.52	38.82	7.094	120.4	-	-	-	-	-	-	-	-	-	-	-
loop G-H	255R	53.54	32.07	8.467	129.1	-	-	-	-	-	-	-	-	-	-	-
loop G-H	256S	59.92	62.68	8.103	116.5	-	-	-	-	-	-	-	-	-	-	-
loop G-H	257D	52.77	39.2	7.792	116.4	-	-	-	-	-	-	-	-	-	-	-
loop G-H	258S	56.02	62.26	7.473	116	-	-	-	-	-	-	-	-	-	-	-
loop G-H	259I	57.47	34.68	8.306	127.6	-	-	-	-	-	-	-	-	-	-	-
loop G-H	260T	55.36	-	9.73	128.2	-	-	-	-	-	-	-	-	-	-	-
loop G-H	261N	54.74	38.28	6.778	119.6	7.09	-	-	-	-	-	-	-	112.6	-	-
helix H	262M	52.89	-	8.01	118.4	-	-	-	-	-	-	-	-	-	-	-
helix H	263L	-	-	7.198	115.7	-	-	-	-	-	-	-	-	-	-	-
helix H	264D	57.12	41.68	7.74	115	-	-	-	-	-	-	-	-	-	-	-
helix H	265T	66.36	67.86	7.615	116.1	-	-	-	-	-	-		3.995	-	-	-
helix H	266L	58.13	41.08	7.868	122.5	-	-	-	-	-	-	-	-	-	-	-
helix H	267M	58.86	29.42	8.809	118	-	-	-	-	-	-	-	-	-	-	-
helix H	268Q	58.27	27.79	8.762	121.6	-	-	-	-	-	-	-	-	-	-	-	d
helix H	268Q'	-	-	8.8	-	-	-	-	-	-	-	-	-	-	-	-
helix H	269A	54.29	17.46	7.349	121.7	-	-	-	-	-	-	-	-	-	-	-	d
helix H	269A'	-	-	7.429	122.1	-	-	-	-	-	-	-	-	-	-	-
helix H	270K	58.72	31.51	7.803	120.1	-	-	-	-	-	-	-	-	-	-	-	d
helix H	270K'	-	-	7.718	119.9	-	-	-	-	-	-	-	-	-	-	-
helix H	271M	57.65	31.39	7.972	119	-	-	-	-	-	-	-	-	-	-	-
helix H	272N	54.1	37.58	8.039	117.4	-	-	-	-	-	-	-	-	-	-	-
helix H	273S	59.88	62.78	7.824	116.3	-	-	-	-	-	-	-	-	-	-	-
disordered	274D	54.96	40	8.181	122.4	-	-	-	-	-	-	-	-	-	-	-	d
disordered	275N'	52.9	-	-	-	-	-	-	-	-	-	-	-	-	-	-
disordered	275N	52.8	38.29	7.917	118	-	-	-	-	-	-	-	-	-	-	-	d
disordered	276G	45.39	-	7.984	108.6	-	-	-	-	-	-	-	-	-	-	-
disordered	276G'	-	-	8.119	109	-	-	-	-	-	-	-	-	-	-	-	d	no collapse
disordered	277N'	53.02	-	8.275	119.2	-	-	-	-	-	-	-	-	-	-	-
disordered	277N	53.01	38.3	8.238	119.2	-	-	-	-	-	-	-	-	-	-	-	d
disordered	278A'	51.87	-	-	-	-	-	-	-	-	-	-	-	-	-	-
disordered	278A	51.71	18.43	8.167	123.7	-	-	-	-	-	-	-	-	-	-	-	d
disordered	279G	44.03	-	7.908	108.4	-	-	-	-	-	-	-	-	-	-	-
disordered	279G'	44.01	-	7.949	107.9	-	-	-	-	-	-	-	-	-	-	-	d	no collapse
disordered	280P	63.27	31.02	-	-	-	-	-	-	-	-	-	-	-	-	-
disordered	281D	53.63	40.16	8.292	119.3	-	-	-	-	-	-	-	-	-	-	-
disordered	282Q	55.65	28.06	7.938	120	-	-		6.927	6.182	-	-	-	109.8		-
loop H-I	283D	54.78	40.35	8.041	121.5	-	-	-	-	-	-	-	-	-	-	-
loop H-I	284S	60.62	62.5	8.175	116.9	-	-	-	-	-	-	-	-	-	-	-
loop H-I	285E	57.35	28.41	8.248	122	-	-	-	-	-	-	-	-	-	-	-
loop H-I	286L	54.52	-	7.55	116.9	-	-	-	-	-	-	-	-	-	-	-
loop H-I	287L	53.11	41.09	7.529	120.1	-	-	-	-	-	-	-	-	-	-	-
loop H-I	288S	58.92	63.79	6.786	114.5	-	-	-	-	-	-	-	-	-	-	-
loop H-I	289D	57.75	38.67	9.097	123.2	-	-	-	-	-	-	-	-	-	-	-
helix I	290N	56.01	38.59	8.337	116.6	-	-	-	-	-	-	-	-	-	-	-
helix I	291H	62.13	33.12	8.225	122.8	-	-	-	-	-	-	-	-	-	-	-
helix I	292I	66.64	36.93	8.487	122	-	-	-	-	-	-	-	-	-	-	-
helix I	293L	58.58	41.4	8.548	118.4	-	-	-	-	-	-	-	-	-	-	-
helix I	294T	66.85	68.02	7.494	114.4	-	-	-	-	-	-	-	-	-	-	-
helix I	295T	63.77	68.94	8.101	116.5	-	-	-	-	-	-	-	-	-	-	-
helix I	296I	58.81	-	8.809	118.5	-	-	-	-	-	-	-	-	-	-	-
helix I	297G	42.68	-	7.44	116.6	-	-	-	-	-	-	-	-	-	-	-
helix I	298D	51.69	42.27	6.487	116.7	-	-	-	-	-	-	-	-	-	-	-
helix I	299I	59.94	-	8.368	117.1	-	-	-	-	-	-	-	-	-	-	-
helix I	300F	56.17	-	8.465	115.6	-	-	-	-	-	-	-	-	-	-	-
helix I	301G	44.05	-	6.583	105.5	-	-	-	-	-	-	-	-	-	-	-
helix I	302A	51.07	-	6.831	122.3	-	-	-	-	-	-	-	-	-	-	-
helix I	303G	-	-	8.784	114.5	-	-	-	-	-	-	-	-	-	-	-
helix I	304V	59.76	-	7.635	117.7	-	-	-	-	-	-	-	-	-	-	-
helix I	306T	65.88	-	7.608	111.1	-	-	-	-	-	-	-	-	-	-	-
helix I	307T	66	69.26	8.039	115.6	-	-	-	-	-	-	-	-	-	-	-
helix I	308T	64.39	65.9	7.734	111.2	-	-	-	-	-	-	-	-	-	-	-
helix I	309S	60.91	62.65	6.563	112.7	-	-	-	-	-	-	-	-	-	-	-
helix I	310V	61.88	-	7.153	116	-	-	-	-	-	-	-	-	-	-	-		slow x
helix I	311V	59.36	-	5.987	117.1	-	-	-	-	-	-	-	-	-	-	-
helix I	312K	-	-	6.818	120.7	-	-	-	-	-	-	-	-	-	-	-
helix I	313W	-	-	7.473	117.8	-	-		10.22	-	-	-	-		130.6	-	d	no collapse, close to 1:1 ratio of peaks, so different phenom?
helix I	313W'	-	-	-	-	-	-		10.25	-	-	-	-		131	-
helix I	314T'	-	-	6.563	112.6	-	-	-	-	-	-	-	-	-	-	-
helix I	314T	-	-	7.507	114.4	-	-	-	-	-	-	-	-	-	-	-
helix I	315L	-	-	8.578	118.5	-	-	-	-	-	-	-	-	-	-	-
helix I	316A	-	-	6.743	-	-	-	-	-	-	-	-	-	-	-	-
helix I	317F	55.96	-	9.849	113.2	-	-	-	-	-	-	-	-	-	-	-
helix I	318L	-	41.86	8.151	122.9	-	-	-	-	-	-	-	-	-	-	-
helix I	319L	-	41.89	8.219	120.5	-	-	-	-	-	-	-	-	-	-	-
helix I	320H	58.03	33.11	9.504	128.9	-	-	-	-	-	-	-	-	-	-	-
	321N	-	-	8.227	118.8	-	-	-	-	-	-	-	-	-	-	-
helix J	322P	64.4	-	-	-	-	-	-	-	-	-	-	-	-	-	-
helix J	323Q	58.41	26.3	9.421	120.4	-	-	-	-	-	-	-	-	-	-	-
helix J	324V	65.1	-	7.262	120.8	-	-	-	-	-	-	-	-	-	-	-
helix J	325K	55.08	27.24	7.579	114.1	-	-	-	-	-	-	-	-	-	-	-
helix J	326K	53.84	27.68	8.259	118.8	-	-	-	-	-	-	-	-	-	-	-
helix J	327K	56.07	28.14	8.426	120.6	-	-	-	-	-	-	-	-	-	-	-
helix J	328L	55.18	40.05	8.256	121.1	-	-	-	-	-	-	-	-	-	-	-
helix J	329Y	60.54	37.81	8.074	115.7	-	-	-	-	-	-	-	-	-	-	-
helix J	329Y'	-	-	8.11	115.8	-	-	-	-	-	-	-	-	-	-	-
helix J	330E'	56.72	-	6.983	121.1	-	-	-	-	-	-	-	-	-	-	-
helix J	330E	56.19	-	6.997	120.3	-	-	-	-	-	-	-	-	-	-	-
helix J	331E	-	-	8.279	119.2	-	-	-	-	-	-	-	-	-	-	-
helix J	331E'	-	-	8.24	119.2	-	-	-	-	-	-	-	-	-	-	-
helix J	332I	59.84	-	7.963	123	-	-	-	-	-	-	-	-	-	-	-
helix J	333D	54.98	-	8.184	123	-	-	-	-	-	-	-	-	-	-	-
helix J	334Q	56.1	-	7.935	121.4	-	-	-	-	-	-	-	-	-	-	-
helix J	335N	55.13	40.35	8.309	120.5	-	-	-	-	-	-	-	-	-	-	-
helix J	336V	63.49	31.65	8.447	120.9	-	-	-	-	-	-	-	-	-	-	-
	337G	44.36	-	7.679	107.4	-	-	-	-	-	-	-	-	-	-	-
	338F	57.97	40.33	8.343	115.6	-	-	-	-	-	-	-	-	-	-	-
	339S	59	62.97	8.593	115.6	-	-	-	-	-	-	-	-	-	-	-
	340R	53.15	30.09	7.285	116.8	-	-	-	-	-	-	-	-	-	-	-
	341T	58.24	67.23	7.502	108.6	-	-	-	-	-	-	-	-	-	-	-
	341T'	-	-	7.356	108.6	-	-	-	-	-	-	-	-	-	-	-
	342P	63.72	-	-	-	-	-	-	-	-	-	-	-	-	-	-
	343T	59.1	71.1	7.042	109.8	-	-	-	-	-	-	-	-	-	-	-
helix J-K	344I'	62.22	-	9.566	123.2	-	-	-	-	-	-	-	-	-	-	-
helix J-K	344I	61.88	35.97	9.536	123	-	-	-	-	-	-	-	-	-	-	-
helix J-K	345S	60.36	61.83	8.509	118.3	-	-	-	-	-	-	-	-	-	-	-
helix J-K	345S'	60.26	-	8.565	118.3	-	-	-	-	-	-	-	-	-	-	-
helix J-K	346D	56.82	39.41	7.867	119.9	-	-	-	-	-	-	-	-	-	-	-
helix J-K	346D'	-	-	7.87	120.3	-	-	-	-	-	-	-	-	-	-	-
helix J-K	347R	59.13	28.23	7.94	125.2	-	-	-	-	-	-	-	-	-	-	-	d	coll
helix J-K	347R'	59	-	8	125.1	-	-	-	-	-	-	-	-	-	-	-
helix J-K	348N	53.73	38.04	7.143	112.3	-	-	-	-	-	-	-	-	-	-	-	d	?
helix J-K	348N'	-	-	7.163	112.6	-	-	-	-	-	-	-	-	-	-	-
helix J-K	349R	55.64	31.72	7.453	115.6	-	-	-	-	-	-	-	-	-	-	-	d	?
helix J-K	349R'	-	-	7.384	115.2	-	-	-	-	-	-	-	-	-	-	-
	350L	52.31	43.36	9.608	131.2	-	-	-	-	-	-	-	-	-	-	-	d	large splitting, exch. in NOESY, collapse
	350L'	52.53	-	9.803	131.3	-	-	-	-	-	-	-	-	-	-	-
helix K	351L	57.35	39.61	6.958	120	-	-	-	-	-	-	-	-	-	-	-	b?
helix K	352L	56.75	38.59	11.62	126.2	-	-	-	-	-	-	-	-	-	-	-	b	prob coll
helix K	353L	58.6	38.47	8.466	126.8	-	-	-	-	-	-	-	-	-	-	-	b	prob coll
helix K	354E'	58.71	-	-	-	-	-	-	-	-	-	-	-	-	-	-
helix K	354E	58.99	28.47	8.327	121.2	-	-	-	-	-	-	-	-	-	-	-
helix K	355A	54.16	16.62	8.309	123.1	-	-	-	-	-	-	-	-	-	-	-	d
helix K	355A'	53.9	-	8.298	123.4	-	-	-	-	-	-	-	-	-	-	-
helix K	356T	64.62	68.21	7.428	115.4	-	-	-	-	-	-		3.994	-	-	-	d	coll
helix K	356T'	-	-	7.347	115.5	-	-	-	-	-	-		3.965	-	-	-
helix K	357I	58.83	41.08	8.428	117.9	-	-	-	-	-	-	-	-	-	-	-	d	prob coll
helix K	358R	53.65	32.54	8.207	114.8	-	-	-	-		8.917	-	-	-	-	-	d	coll
helix K	359E	-	55.28	-	-	-	-	-	-	-	-	-	-	-	-	-
helix K	360V	58.41	-	8.618	117.1	-	-	-	-	-	-	-	-	-	-	-
helix K	361L	51.64	40.03	6.942	120.4	-	-	-	-	-	-	-	-	-	-	-
helix K	362R	57.11	27.88	8.099	121.7	-	-	-	-	-	-	-	-	-	-	-
loop K-b3	365P	64.67	-	-	-	-	-	-	-	-	-	-	-	-	-	-
loop K-b3	366V	63.62	-	7.91	118.5	-	-	-	-	-	-	-	-	-	-	-
loop K-b3	367A	54.84	17.87	7.68	120.4	-	-	-	-	-	-	-	-	-	-	-
loop K-b3	368P	62.14	-	-	-	-	-	-	-	-	-	-	-	-	-	-
loop K-b3	369M	54.78	-	8.987	119.6	-	-	-	-	-	-	-	-	-	-	-
loop K-b3	370L	-	-	8.428	132.2	-	-	-	-	-	-	-	-	-	-	-
loop K-b3	371I	-	-	7.517	120.2	-	-	-	-	-	-	-	-	-	-	-
loop K-b3	372P	63.24	-	-	-	-	-	-	-	-	-	-	-	-	-	-
loop K-b3	373H	57.27	-	8.987	130.4	-	-	-	-	-	-	-	-	-	-	-
b3,b4	374K	55.67	29.61	8.444	129.8	-	-	-	-	-	-	-	-	-	-	-	b	narrows
b3,b4	375A	51	15.81	9.03	123.3	-	-	-	-	-	-	-	-	-	-	-
b3,b4	376N	53.96	39.36	9.244	127.5	7.355	-	-	-	-	-	-	-	111.3	-	-
b3,b4	377V	57.53	35.15	7.226	110.4	-	-	-	-	-	-	-	-	-	-	-
b3,b4	378D	54.81	39.14	8.141	120.7	-	-	-	-	-	-	-	-	-	-	-
b3,b4	379S	55.98	62.25	8.046	115.6	-	-	-	-	-	-	-	-	-	-	-
b3,b4	380S	56.56	65.46	9.058	115.9	-	-	-	-	-	-	-	-	-	-	-	b	narrows
b3,b4	381I	-	-	9.78	119.8	-	-	-	-	-	-	-	-	-	-	-
b3,b4	382G	44.26	-	9.094	106.6	-	-	-	-	-	-	-	-	-	-	-	b	narrows
b3,b4	383E'	57.88	-	7.744	112.8	-	-	-	-	-	-	-	-	-	-	-
b3,b4	383E	53.52	-	7.976	122.3	-	-	-	-	-	-	-	-	-	-	-
b3,b4	384F'	65.49	-	9.156	122.2	-	-	-	-	-	-	-	-	-	-	-	d
b3,b4	384F	-	-	9.157	121.7	-	-	-	-	-	-	-	-	-	-	-
b3,b4	385A	55.07	-	8.24	121	-	-	-	-	-	-	-	-	-	-	-	d	slo x
b3,b4	386V	60.52	34.28	8.263	126.5	-	-	-	-	-	-	-	-	-	-	-
b3,b4	387D	53.61	40.78	8.553	126.5	-	-	-	-	-	-	-	-	-	-	-	b/d	maybe narrows slightly
b3,b4	388K	58.02	31.22	9.463	124.7	-	-	-	-	-	-	-	-	-	-	-
b3,b4	389G	44.34	-	8.993	114.7	-	-	-	-	-	-	-	-	-	-	-	d
b3,b4	390T	61.4	68.39	7.608	119	-	-	-	-	-	-	-	-	-	-	-
b3,b4	391E	55.17	24.05	7.808	123.6	-	-	-	-	-	-	-	-	-	-	-	b/d
b3,b4	392V	58.91	33.6	8.503	124.7	-	-	-	-	-	-	-	-	-	-	-
b3,b4	393I	60.8	39.8	8.645	122.4	-	-	-	-	-	-	-	-	-	-	-	b
b3,b4	394I	59.31	-	8.216	121.2	-	-	-	-	-	-	-	-	-	-	-	b
	395N	55.27	-	-	-	-	-	-	-	-	-	-	-	-	-	-	b
helix K'	396L	58.52	41.45	7.094	119.9	-	-	-	-	-	-	-	-	-	-	-	b
helix K'	398A	-	17.25	7.75	129.6	-	-	-	-	-	-	-	-	-	-	-	b
helix K'	399L	-	-	7.577	128.2	-	-	-	-	-	-	-	-	-	-	-	b
helix K'	400H	-	34.93	8.349	115.4	-	-	-	-	-	-	-	-	-	-	-	b
helix K'	401H	-	-	8.994	119.7	-	-	-	-	-	-	-	-	-	-	-	b
meander	402N	52.09	-	-	-	-	-	-	-	-	-	-	-	-	-	-
meander	403E	53.42	30.37	7.451	118.4	-	-	-	-	-	-	-	-	-	-	-
meander	404K	54.99	28.62	7.976	121.1	-	-	-	-	-	-	-	-	-	-	-
meander	405E	56.18	25.97	9.184	121.3	-	-	-	-	-	-	-	-	-	-	-
meander	406W	-	-	8.19	118	-	-	-	-	-	-	-	-	-	-	-
meander	407H	-	-	8.05	118.7	-	-	-	-	-	-	-	-	-	-	-
meander	409P	63.44	-	-	-	-	-	-	-	-	-	-	-	-	-	-
meander	410D	54.15	40.11	8.539	116.8	-	-	-	-	-	-	-	-	-	-	-
meander	411Q	54.17	29.32	7.684	120.1	-	-	-	-	-	-	-	-	-	-	-
meander	412F	57.33	37.42	8.519	124.3	-	-	-	-	-	-	-	-	-	-	-
meander	416R	-	-	8.412	124.5	-	-	-	-	-	-	-	-	-	-	-
meander	417F	58.23	-	7.449	122	-	-	-	-	-	-	-	-	-	-	-
meander	418L	52.37	45.04	7.838	123.2	-	-	-	-	-	-	-	-	-	-	-
meander	419N	51.59	33.96	8.125	117.9	6.708	7.356	-	-	-	-	-	-	113.2	-	-
meander	420P	65.94	30.26	-	-	-	-	-	-	-	-	-	-	-	-	-
meander	421A	51.89	18.46	7.441	114.7	-	-	-	-	-	-	-	-	-	-	-	d	prob coll
meander	421A'
meander	422G	45.78	-	8.129	108.8	-	-	-	-	-	-	-	-	-	-	-	d	prob coll
meander	422G'
meander	423T	60.59	69.9	8.525	108.2	-	-	-	-	-	-	-	-	-	-	-	d	coll
meander	423T'	-	-	8.614	108.4	-	-	-	-	-	-	-	-	-	-	-
meander	424Q	54.48	32.22	7.353	119.4	-	-	7.536	6.501		-	-	-	109.9		-	d	coll
meander	424Q'	-	-	-	-	-	-	7.53	6.616		-	-	-	110.5		-
meander	425L	54.65	42	8.406	124.4	-	-	-	-	-	-	-	-	-	-	-
meander	426I	58.84	41.11	8.443	118	-	-	-	-	-	-	-	-	-	-	-	d	coll
meander	426I'	-	-	8.422	117.9	-	-	-	-	-	-	-	-	-	-	-
meander	427S	53.62	62.4	8.205	115.4	-	-	-	-	-	-	-	-	-	-	-	d	coll
meander	428P	63.13	-	-	-	-	-	-	-	-	-	-	-	-	-	-
meander	429S	55.42	-	6.662	110.3	-	-	-	-	-	-	-	-	-	-	-
meander	430V	59.49	-	8.88	118.8	-	-	-	-	-	-	-	-	-	-	-
meander	431S	56.57	-	7.462	124.9	-	-	-	-	-	-	-	-	-	-	-
meander	433L	-	-	7.954	121.1	-	-	-	-	-	-	-	-	-	-	-
meander	434P	60.68	-	-	-	-	-	-	-	-	-	-	-	-	-	-
meander	435F	55.18	37.23	7.921	122.1	-	-	-	-	-	-	-	-	-	-	-
meander	436G	-	-	9.087	106.6	-	-	-	-	-	-	-	-	-	-	-
meander	437A	55.07	16.73	7.954	121.8	-	-	-	-	-	-	-	-	-	-	-
meander	438G	45.4	-	8.336	110.4	-	-	-	-	-	-	-	-	-	-	-
meander	440R	-	-	8.146	117.7	-	-	-	-	-		9.235	-	-		125.6
meander	443I	57.91	-	8.485	122	-	-	-	-	-	-	-	-	-	-	-
meander	444G	42.74	-	7.129	115.3	-	-	-	-	-	-	-	-	-	-	-
helix L	445E	55.78	-	6.831	118.3	-	-		-	-	-	-	-	-	-	-
helix L	446I	59.16	-	8.199	127.2	-	-	-	-	-	-	-	-	-	-	-
helix L	447L	56.98	-	8.405	120.4	-	-	-	-	-	-	-	-	-	-	-
helix L	448A	51.97	18.48	8.341	125	-	-	-	-	-	-	-	-	-	-	-	b
helix L	449R	51.74	31.81	8.12	121.4	-	-	-	-	-	-	-	-	-	-	-	d
helix L	449R'	-	-	8.121	121.6	-	-	-	-	-	-	-	-	-	-	-
helix L	450Q	60.47	27.78	8.167	121.6	-	-	-	-	-	-	-	-	-	-	-	overlapped
helix L	451E	60.35	31.39	7.602	117.6	-	-	-	-	-	-	-	-	-	-	-
helix L	452L	-	-	7.489	119.5	-	-	-	-	-	-	-	-	-	-	-
helix L	453F	53.53	-	7.784	118.9	-	-	-	-	-	-	-	-	-	-	-
helix L	454L	59.93	-	8.116	116.9	-	-	-	-	-	-	-	-	-	-	-
helix L	455I	-	-	7.364	117.5	-	-	-	-	-	-	-	-	-	-	-
helix L	457A	-	-	8.131	120.1	-	-	-	-	-	-	-	-	-	-	-
helix L	458W	57.48	-	8.673	126.9	-	-	-	-	-	-	-	-	-	-	-
helix L	459L	59.39	37.79	7.315	118	-	-	-	-	-	-	-	-	-	-	-
helix L	460L	59.06	41.32	7.439	119.3	-	-	-	-	-	-	-	-	-	-	-
helix L	462R	-	-	6.539	111	-	-	-	-	-	-	-	-	-	-	-
b5	463F	58.29	38.48	8.788	117.5	-	-	-	-	-	-	-	-	-	-	-
b5	464D	54.62	41.38	7.982	126.9	-	-	-	-	-	-	-	-	-	-	-	d	prob coll
b5	465L	52.89	41.82	7.306	125.1	-	-	-	-	-	-	-	-	-	-	-
b5	466E	53.04	33.1	8.761	121.9	-	-	-	-	-	-	-	-	-	-	-
b5	467V	60.89	31.3	8.467	122.6	-	-	-	-	-	-	-	-	-	-	-
b5	468P	62.48	32.21	-	-	-	-	-	-	-	-	-	-	-	-	-
b5	469D	56.77	39.81	8.173	119.9	-	-	-	-	-	-	-	-	-	-	-
b5	470D	53.35	39.17	7.807	116.4	-	-	-	-	-	-	-	-	-	-	-
b5	471G	44.88	-	8.197	108.6	-	-	-	-	-	-	-	-	-	-	-
b5	472Q	55.85	28.26	7.701	120.1	-	-	-	-	-	-	-	-	-	-	-
b5	473L	51.56	41.21	8.186	125.4	-	-	-	-	-	-	-	-	-	-	-
b5	474P	61.46	31.1	-	-	-	-	-	-	-	-	-	-	-	-	-
b5	475S	56.93	62.6	8.65	118.3	-	-	-	-	-	-	-	-	-	-	-
b5	476L	53.11	39.5	8.731	127.2	-	-	-	-	-	-	-	-	-	-	-
b5	476L'	57.19	-	8.76	127.2	-	-	-	-	-	-	-	-	-	-	-
b5	477E	59.28	29.44	7.943	122.7	-	-	-	-	-	-	-	-	-	-	-
b5	477E'	57.14	-	7.748	114.7	-	-	-	-	-	-	-	-	-	-	-
b5	478G	44.19	-	8.148	110.2	-	-	-	-	-	-	-	-	-	-	-
b5	479I	63.03	-	9.52	118.3	-	-	-	-	-	-	-	-	-	-	-
b5	479I'	-	-	9.557	118.5	-	-	-	-	-	-	-	-	-	-	-
b5	480P	62.65	-	-	-	-	-	-	-	-	-	-	-	-	-	-
b5	481K	55.5	-	8.47	121.2	-	-	-	-	-	-	-	-	-	-	-
b5	482V	61.09	-	8.583	127.3	-	-	-	-	-	-	-	-	-	-	-
b5	483V	62.92	-	8.875	127.6	-	-	-	-	-	-	-	-	-	-	-
b5	484F			8.678	125.4
b5	485L	-	-	8.027	124.1	-	-	-	-	-	-	-	-	-	-	-
b5	486I	63.64	-	7.989	125.2	-	-	-	-	-	-	-	-	-	-	-
b5	487D	49.65	-	7.369	121.1	-	-	-	-	-	-	-	-	-	-	-
b5	488S	57.11	62.63	8.755	127.1	-	-	-	-	-	-	-	-	-	-	-
b5	489F	-	-	7.816	124.3	-	-	-	-	-	-	-	-	-	-	-	d	poss coll
b5	490K	55.45	29.6	7.532	119.9	-	-	-	-	-	-	-	-	-	-	-
b5	491V	61.72	32.18	8.002	121.8	-	-	-	-	-	-	-	-	-	-	-
b5	492K	54.9	31.96	8.085	120.8	-	-	-	-	-	-	-	-	-	-	-
b5	493I	60.08	39.66	7.979	127.2	-	-	-	-	-	-	-	-	-	-	-	d	coll
b5	493I'	-	-	8.023	127.1	-	-	-	-	-	-	-	-	-	-	-
b5	494K	53.94	31.77	8.165	121.8	-	-	-	-	-	-	-	-	-	-	-
b5	495V	63.13	31.07	8.666	125.6	-	-	-	-	-	-	-	-	-	-	-	b	prob coll
	496R	57.21	26.68	7.798	119	-	-	-	-	-	-	-	-	-	-	-
	497Q	58.57	30.13	8.985	127.6	-	-	-	-	-	-	-	-	-	-	-
	498A	53.99	17.5	8.714	119.1	-	-	-	-	-	-	-	-	-	-	-
	499W	60.53	40.04	6.393	115.7	-	-	-	-	-	-	-	-	-	-	-	d	coll
	499W'	-	-	6.308	115.6	-	-	-	-	-	-	-	-	-	-	-
	500R	58.9	28.7	7.847	119.5	-	-	-	-	-	-	-	-	-	-	-
	501E	58.01	28.14	8.258	118	-	-	-	-	-	-	-	-	-	-	-
	502A	52.85	18.13	6.828	120.5	-	-	-	-	-	-	-	-	-	-	-
	503Q	54.81	26.71	7.17	116	-	-	6.03	6.203		-	-	-	113.7		-
	504A	52.49	17.71	7.484	122.8	-	-	-	-	-	-	-	-	-	-	-
	505E	56.74	28.61	7.945	119.9	-	-	-	-	-	-	-	-	-	-	-
	506G	45.12	-	8.11	109.4	-	-	-	-	-	-	-	-	-	-	-
	507S	58.2	63.11	7.963	115.6	-	-	-	-	-	-	-	-	-	-	-
	508T	61.67	69.03	7.898	115.1	-	-	-	-	-	-	-	-	-	-	-
His tag	509H	55.68	31.6	8.085	120.7	-	-	-	-	-	-	-	-	-	-	-
His tag	510H	55.86	32.13	8.121	117.1	-	-	-	-	-	-	-	-	-	-	-
His tag	511H	55.3	43.2	-	-	-	-	-	-	-	-	-	-	-	-	-
His tag	512H	56.68	-	8.116	125.7	-	-	-	-	-	-	-	-	-	-	-
